# Supplementary material for: Crayfish Recognize the Faces of Fight Opponents
Source: PubMed Central journal article supplement (PMC2257977; doi:10.1371/journal.pone.0001695), 2008-02-27
Supplement: pone.0001695.s001.pdf [file pone.0001695.s001.pdf]

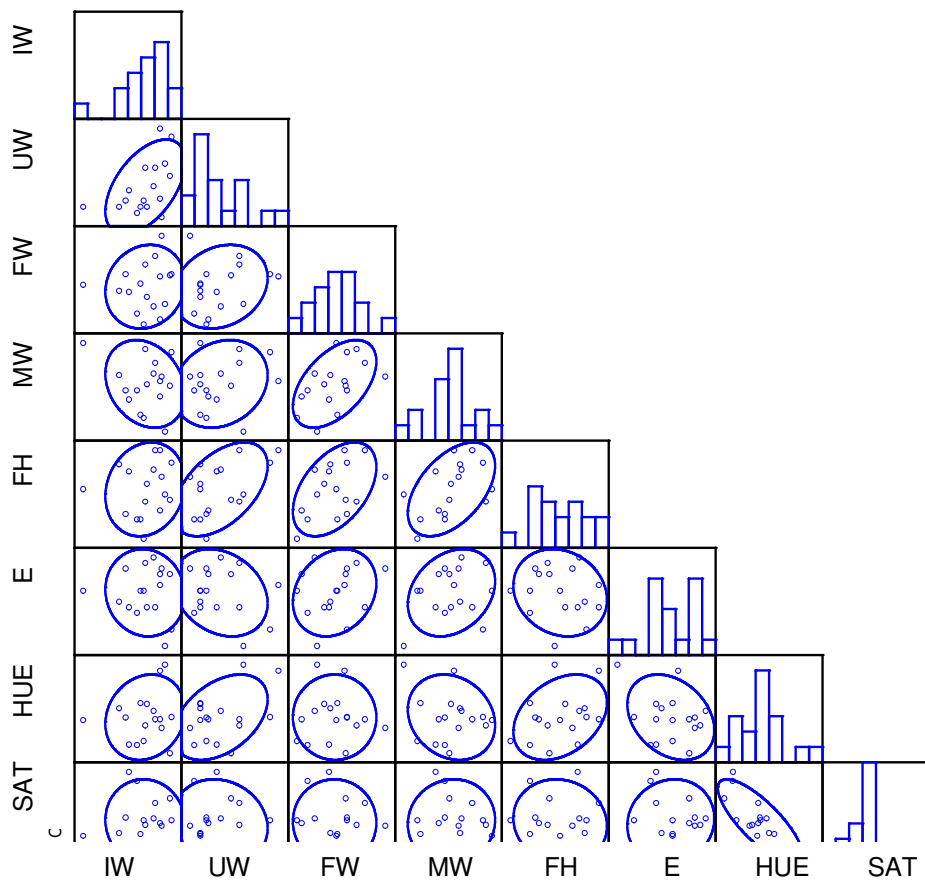

**Table of Pearson Correlation Coefficients**

|     | IW     | UW     | FW     | MW     | FH     | E      | HUE    | SAT   |
|-----|--------|--------|--------|--------|--------|--------|--------|-------|
| IW  | 1.000  | .      | .      | .      | .      | .      | .      | .     |
| UW  | 0.518  | 1.000  | .      | .      | .      | .      | .      | .     |
| FW  | 0.121  | 0.210  | 1.000  | .      | .      | .      | .      | .     |
| MW  | -0.234 | 0.199  | 0.512  | 1.000  | .      | .      | .      | .     |
| FH  | 0.148  | 0.503  | 0.473  | 0.501  | 1.000  | .      | .      | .     |
| E   | -0.073 | -0.243 | 0.214  | 0.263  | -0.164 | 1.000  | .      | .     |
| HUE | 0.152  | 0.421  | -0.004 | -0.183 | 0.342  | -0.301 | 1.000  | .     |
| SAT | -0.048 | -0.144 | -0.013 | 0.050  | -0.094 | 0.086  | -0.794 | 1.000 |

**Abbreviations**

**IW** inner width, **UW** upper width, **FW** facial width, **MW** mid width, **FH** facial height, **E** eye, **HUE** hue, **SAT** saturation.
